# Supplementary material for: Chemoprevention of DMH-Induced Early Colon Carcinogenesis in Male BALB/c Mice by Administration of Lactobacillus Paracasei DTA81
Source: PubMed Central journal article supplement (PMC7765108; doi:10.3390/microorganisms8121994), 2020-12-14
Supplement: microorganisms-08-01994-s001.pdf [file microorganisms-08-01994-s001.pdf]

# Chemoprevention of DMH-Induced Early Colon Carcinogenesis in Male BALB/c Mice by Administration of *Lactobacillus Paracasei* DTA81

Vinicius da Silva Duarte <sup>1,2</sup>, Bruna Cristina dos Santos Cruz <sup>3</sup>, Armin Tarrach <sup>1</sup>, Roberto Sousa Dias <sup>4</sup>, Luiza de Paula Dias Moreira <sup>1</sup>, Wilson José Fernandes Lemos Junior <sup>5</sup>, Lívia Carneiro Fidélis Silva <sup>2</sup>, Gabriele Rocha Santana <sup>4</sup>, Leandro Licursi de Oliveira <sup>4</sup>, Maria do Carmo Gouveia Peluzio <sup>3</sup>, Hilario Cuquetto Mantovani <sup>2</sup>, Viviana Corich <sup>1</sup> and Alessio Giacomini <sup>1,\*</sup> and Sérgio Oliveira de Paula <sup>4,\*</sup>

<sup>1</sup> Department of Agronomy Food Natural Resources Animals and Environment, University of Padova, Viale dell'Università, 16, 35020 Legnaro (PD), Italy; [vinicius.dasilvaduarte@unipd.it](mailto:vinicius.dasilvaduarte@unipd.it) (V.d.S.D.); [tarrach.armin@gmail.com](mailto:tarrach.armin@gmail.com) (A.T.); [luiza.depauladiasmoreira@studenti.unipd.it](mailto:luiza.depauladiasmoreira@studenti.unipd.it) (L.d.P.D.M.); [viviana.corich@unipd.it](mailto:viviana.corich@unipd.it) (V.C.)

<sup>2</sup> Department of Microbiology, Av. Peter Henry Rolfs, s/n, Campus Universitário, Universidade Federal de Vicosa, 36570-900 Vicosa, Brazil; [livia.silva@ufv.br](mailto:livia.silva@ufv.br) (L.C.F.S.); [hcm6@ufv.br](mailto:hcm6@ufv.br) (H.C.M.)

<sup>3</sup> Department of Nutrition and Health, Av. Peter Henry Rolfs, s/n, Campus Universitário, Universidade Federal de Vicosa, 36570-900 Vicosa, Brazil; [brunacruz09@yahoo.com.br](mailto:brunacruz09@yahoo.com.br) (B.C.d.S.C.); [mcpeluzio@gmail.com](mailto:mcpeluzio@gmail.com) (M.d.C.G.P.)

<sup>4</sup> Department of General Biology, Av. Peter Henry Rolfs, s/n, Campus Universitario, Universidade Federal de Vicosa, 36570-900 Vicosa, Brazil; [roberto.dias@ufv.br](mailto:roberto.dias@ufv.br) (R.S.D.); [gabi.rocha-s@hotmail.com](mailto:gabi.rocha-s@hotmail.com) (G.R.S.); [leandro.licursi@ufv.br](mailto:leandro.licursi@ufv.br) (L.L.d.O.)

<sup>5</sup> Faculty of Science and Technology, Free University of Bolzano-Bozen, 39100 Bolzano, Italy; [juniorjfflemos@gmail.com](mailto:juniorjfflemos@gmail.com)

\* Correspondence: [alessio.giacomini@unipd.it](mailto:alessio.giacomini@unipd.it) (A.G.); [depaula@ufv.br](mailto:depaula@ufv.br) (S.O.d.P.); Tel.: +39-328-0390077 (A.G.); +55-31-3612-5016 (S.O.d.P.)

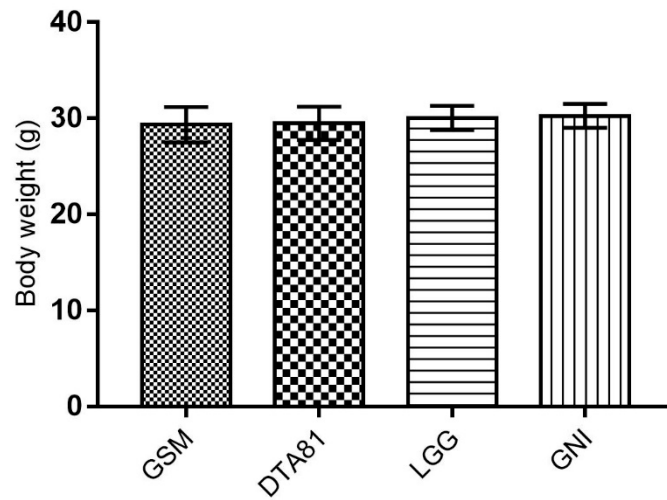

**Figure S1. Animals were randomized by body weight before starting the experimental period. There were no statistically significant differences among the groups ( $p > 0.05$ ).**

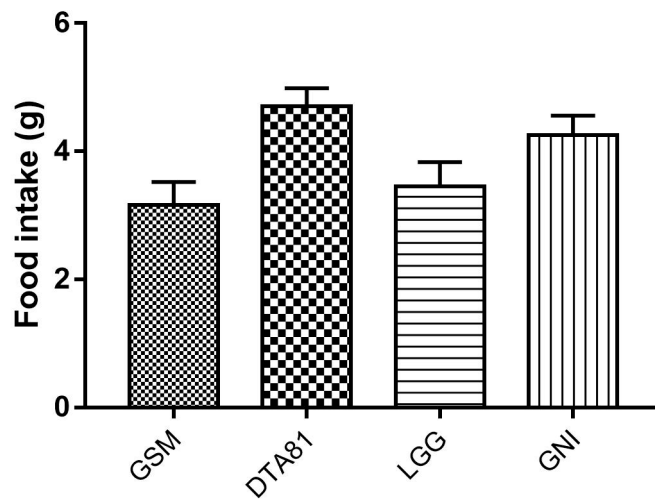

**Figure S2. Food intake comparison among the groups following DMH injection was carried out with the non-parametric Kruskal-Wallis method and Dunn's post-hoc multiple comparison test. Data represent the mean weight during the experimental period. Data are shown as mean  $\pm$  SEM.**
